# Supplementary material for: COVIDiSTRESS Global Survey dataset on psychological and behavioural consequences of the COVID-19 outbreak
Source: Sci Data. 2021 Jan 4;8:3. doi: 10.1038/s41597-020-00784-9 (PMC7782539; doi:10.1038/s41597-020-00784-9)
Supplement: Supplementary file 1 — Figure S1. [file 41597_2020_784_MOESM1_ESM.pdf]

|                             | Affiliation, Country                                                                                                                                                      | Conceptualization | Data curation | Formal analysis | Funding acquisition | Investigation | Methodology | Project administration | Resources | Software | Supervision | Validation | Visualization | Writing (original draft) | Writing (review & editing) | Funding Information                                                                                      |  |
|-----------------------------|---------------------------------------------------------------------------------------------------------------------------------------------------------------------------|-------------------|---------------|-----------------|---------------------|---------------|-------------|------------------------|-----------|----------|-------------|------------|---------------|--------------------------|----------------------------|----------------------------------------------------------------------------------------------------------|--|
| Yuki Yamada                 | Kyushu University, Faculty of Arts and Science, Japan                                                                                                                     |                   |               |                 |                     |               |             |                        |           |          |             |            |               |                          |                            | JSPS KAKENHI Grants JP17H00875, JP18K12015, JP20H04581                                                   |  |
| Dominik-Borna Čepulić       | Catholic University of Croatia, Department of Psychology                                                                                                                  |                   |               |                 |                     |               |             |                        |           |          |             |            |               |                          |                            |                                                                                                          |  |
| Tao Coll-Martín             | Mind, Brain, and Behavior Research Center (CIMCYC), University of Granada, Granada, Spain                                                                                 |                   |               |                 |                     |               |             |                        |           |          |             |            |               |                          |                            |                                                                                                          |  |
| Stephane Debove             | Independent researcher, France                                                                                                                                            |                   |               |                 |                     |               |             |                        |           |          |             |            |               |                          |                            |                                                                                                          |  |
| Gautreau Guillaume          | Université Paris-Saclay, France                                                                                                                                           |                   |               |                 |                     |               |             |                        |           |          |             |            |               |                          |                            |                                                                                                          |  |
| Hyemin Han                  | University of Alabama, Educational Psychology Program, USA                                                                                                                |                   |               |                 |                     |               |             |                        |           |          |             |            |               |                          |                            |                                                                                                          |  |
| Jesper Rasmussen            | Aarhus University, Department of Political Science, Denmark                                                                                                               |                   |               |                 |                     |               |             |                        |           |          |             |            |               |                          |                            |                                                                                                          |  |
| Thao P. Tran                | Colorado State University, Psychology, USA                                                                                                                                |                   |               |                 |                     |               |             |                        |           |          |             |            |               |                          |                            |                                                                                                          |  |
| Giovanni A. Travaglino      | University of Kent, UK                                                                                                                                                    |                   |               |                 |                     |               |             |                        |           |          |             |            |               |                          |                            |                                                                                                          |  |
| Andreas Lieberoth           | Aarhus University, Danish School of Education (DPU) and Interacting Minds Center (IMC), Denmark                                                                           |                   |               |                 |                     |               |             |                        |           |          |             |            |               |                          |                            |                                                                                                          |  |
|                             |                                                                                                                                                                           |                   |               |                 |                     |               |             |                        |           |          |             |            |               |                          |                            |                                                                                                          |  |
| Consortium authors          |                                                                                                                                                                           |                   |               |                 |                     |               |             |                        |           |          |             |            |               |                          |                            |                                                                                                          |  |
| Angélique M. Blackburn      | Texas A&M International University, Department of Psychology & Communications, USA                                                                                        |                   |               |                 |                     |               |             |                        |           |          |             |            |               |                          |                            |                                                                                                          |  |
| Lois Boullu                 | Independant, France                                                                                                                                                       |                   |               |                 |                     |               |             |                        |           |          |             |            |               |                          |                            |                                                                                                          |  |
| Mila Buić                   | Tampere University, Faculty of Information Technology and Communication Sciences, Finland                                                                                 |                   |               |                 |                     |               |             |                        |           |          |             |            |               |                          |                            |                                                                                                          |  |
| Grace Byrne                 | Developmental Psychology, Vrije Universiteit Amsterdam, the Netherlands                                                                                                   |                   |               |                 |                     |               |             |                        |           |          |             |            |               |                          |                            |                                                                                                          |  |
| Marjolein C.J. Caniels      | Open University, Faculty of Management sciences                                                                                                                           |                   |               |                 |                     |               |             |                        |           |          |             |            |               |                          |                            |                                                                                                          |  |
| Ivan Flis                   | Catholic University of Croatia, Department of Psychology                                                                                                                  |                   |               |                 |                     |               |             |                        |           |          |             |            |               |                          |                            |                                                                                                          |  |
| Marta Kowal                 | University of Wrocław, Institute of Psychology, Poland                                                                                                                    |                   |               |                 |                     |               |             |                        |           |          |             |            |               |                          |                            |                                                                                                          |  |
| Nikolay R. Rachev           | Sofia University St. Kliment Ohridski, Bulgaria, Department of General, Experimental, Developmental, and Health Psychology                                                |                   |               |                 |                     |               |             |                        |           |          |             |            |               |                          |                            |                                                                                                          |  |
| Vicenta Reynoso-Alcántara   | University of Veracruz; National Autonomous University of Mexico                                                                                                          |                   |               |                 |                     |               |             |                        |           |          |             |            |               |                          |                            |                                                                                                          |  |
| Oulmann Zerhouni            | Université Paris Nanterre                                                                                                                                                 |                   |               |                 |                     |               |             |                        |           |          |             |            |               |                          |                            |                                                                                                          |  |
| Oli Ahmed                   | Department of Psychology, University of Chittagong, Bangladesh                                                                                                            |                   |               |                 |                     |               |             |                        |           |          |             |            |               |                          |                            |                                                                                                          |  |
| Rizwana Amin                | Bahria University Islamabad, Dept of Professional Psychology, Pakistan                                                                                                    |                   |               |                 |                     |               |             |                        |           |          |             |            |               |                          |                            |                                                                                                          |  |
| Sibele Aquino               | Pontifical Catholic University of Rio de Janeiro, Brazil                                                                                                                  |                   |               |                 |                     |               |             |                        |           |          |             |            |               |                          |                            |                                                                                                          |  |
| João Carlos Areias          | University of Porto, Faculty of Psychology and Educational Sciences, Portugal                                                                                             |                   |               |                 |                     |               |             |                        |           |          |             |            |               |                          |                            |                                                                                                          |  |
| John Jamir Benzon R. Aruta  | De La Salle University, Manila, Philippines                                                                                                                               |                   |               |                 |                     |               |             |                        |           |          |             |            |               |                          |                            |                                                                                                          |  |
| Dastan Bamwesigye           | Mendel University in Brno                                                                                                                                                 |                   |               |                 |                     |               |             |                        |           |          |             |            |               |                          |                            |                                                                                                          |  |
| Jozef Bavolar               | Pavol Jozef Safarik University, Faculty of Arts, Department of Psychology, Slovakia                                                                                       |                   |               |                 |                     |               |             |                        |           |          |             |            |               |                          |                            |                                                                                                          |  |
| Andrew R. Bender            | Michigan State University, Department of Epidemiology and Biostatistics, East Lansing, USA                                                                                |                   |               |                 |                     |               |             |                        |           |          |             |            |               |                          |                            |                                                                                                          |  |
| Pratik Bhandari             | Department of Psychology, and Department of Language Science and Technology, Saarland University, Germany                                                                 |                   |               |                 |                     |               |             |                        |           |          |             |            |               |                          |                            |                                                                                                          |  |
| Tuba Bircan                 | Vrije Uiversiteit Brussel, Interface Demography                                                                                                                           |                   |               |                 |                     |               |             |                        |           |          |             |            |               |                          |                            |                                                                                                          |  |
| Huseyin Cakal               | School of Psychology, Keele University                                                                                                                                    |                   |               |                 |                     |               |             |                        |           |          |             |            |               |                          |                            |                                                                                                          |  |
| Tereza Capelos              | University of Birmingham, UK                                                                                                                                              |                   |               |                 |                     |               |             |                        |           |          |             |            |               |                          |                            |                                                                                                          |  |
| Jiří Čeněk                  | Mendel University in Brno                                                                                                                                                 |                   |               |                 |                     |               |             |                        |           |          |             |            |               |                          |                            | Czech Science Foundation GC19-09265J                                                                     |  |
| Brendan Ch'ng               | Department of Educational Psychology and Counselling, Faculty of Education, University of Malaya                                                                          |                   |               |                 |                     |               |             |                        |           |          |             |            |               |                          |                            |                                                                                                          |  |
| Fang-Yu Chen                | Michigan State University                                                                                                                                                 |                   |               |                 |                     |               |             |                        |           |          |             |            |               |                          |                            |                                                                                                          |  |
| Stavroula Chrona            | King's College London, School of Politics and Economics, Department of European and International Studies (EIS)                                                           |                   |               |                 |                     |               |             |                        |           |          |             |            |               |                          |                            |                                                                                                          |  |
| Carlos C. Contreras-Ibáñez  | Departamento de Sociología. Universidad Autónoma Metropolitana, Iztapalapa. Mexico                                                                                        |                   |               |                 |                     |               |             |                        |           |          |             |            |               |                          |                            |                                                                                                          |  |
| Pablo Sebastián Correa      | Instituto de Investigaciones Psicológicas (IIPsi), Universidad Nacional de Córdoba (UNC), Consejo Nacional de Investigaciones Científicas y Técnicas (CONICET), Argentina |                   |               |                 |                     |               |             |                        |           |          |             |            |               |                          |                            |                                                                                                          |  |
| Irene Cristofori            | Department of Biology, University Claude Bernard Lyon 1/ Institute of Cognitive Sciences Marc Jeannerod CNRS UMR5229                                                      |                   |               |                 |                     |               |             |                        |           |          |             |            |               |                          |                            |                                                                                                          |  |
| Wilson Cyrus-Lai            | INSEAD                                                                                                                                                                    |                   |               |                 |                     |               |             |                        |           |          |             |            |               |                          |                            |                                                                                                          |  |
| Guillermo Delgado-García    | Instituto Nacional de Neurología y Neurocirugía, Mexico                                                                                                                   |                   |               |                 |                     |               |             |                        |           |          |             |            |               |                          |                            | Consejo Nacional de Ciencia y Tecnología (Conacyt), Full National Scholarship - MSc degree (CVU: 613905) |  |
| Eliane Deschrijver          | Ghent University, Department of Experimental Psychology, Belgium; University of New South Wales (UNSW), School of Psychology, Australia                                   |                   |               |                 |                     |               |             |                        |           |          |             |            |               |                          |                            | Research Foundation Flanders (FWO) postdoctoral fellowship                                               |  |
| Carlos Díaz                 | Independent researcher. Denmark                                                                                                                                           |                   |               |                 |                     |               |             |                        |           |          |             |            |               |                          |                            |                                                                                                          |  |
| İlknur Dilekler             | TOBB University of Economics and Technology, Department of Psychology, Turkey                                                                                             |                   |               |                 |                     |               |             |                        |           |          |             |            |               |                          |                            |                                                                                                          |  |
| Vilius Dranseika            | Faculty of Social Sciences, Arts and Humanities, Kaunas University of Technology, Lithuania                                                                               |                   |               |                 |                     |               |             |                        |           |          |             |            |               |                          |                            |                                                                                                          |  |
| Dmitrii Dubrov              | National Research University Higher School of Economics, Russian Federation                                                                                               |                   |               |                 |                     |               |             |                        |           |          |             |            |               |                          |                            | The HSE University Basic Research Program                                                                |  |
| Kristina Eichel             | Department of Psychiatry and Human Behavior, Warren Alpert Medical School, Brown University, USA                                                                          |                   |               |                 |                     |               |             |                        |           |          |             |            |               |                          |                            |                                                                                                          |  |
| Eda Ermagan-Caglar          | University of Northampton, Department of Psychology                                                                                                                       |                   |               |                 |                     |               |             |                        |           |          |             |            |               |                          |                            |                                                                                                          |  |
| Rebekah Gelpi               | University of Toronto, Department of Psychology                                                                                                                           |                   |               |                 |                     |               |             |                        |           |          |             |            |               |                          |                            |                                                                                                          |  |
| Rubén Flores González       | University of Veracruz                                                                                                                                                    |                   |               |                 |                     |               |             |                        |           |          |             |            |               |                          |                            |                                                                                                          |  |
| Amanda Griffin              | University of Oregon                                                                                                                                                      |                   |               |                 |                     |               |             |                        |           |          |             |            |               |                          |                            |                                                                                                          |  |
| Moh Abdul Hakim             | Department of Psychology, Universitas Sebelas Maret                                                                                                                       |                   |               |                 |                     |               |             |                        |           |          |             |            |               |                          |                            |                                                                                                          |  |
| Krzysztof Hanusz            | Institute of Psychology Polish Academy of Sciences                                                                                                                        |                   |               |                 |                     |               |             |                        |           |          |             |            |               |                          |                            |                                                                                                          |  |
| Yuen Wan Ho                 | Northeastern University, Psychology Department, USA                                                                                                                       |                   |               |                 |                     |               |             |                        |           |          |             |            |               |                          |                            |                                                                                                          |  |
| Dayana Hristova             | Faculty of Psychology, University of Vienna                                                                                                                               |                   |               |                 |                     |               |             |                        |           |          |             |            |               |                          |                            |                                                                                                          |  |
| Barbora Hubena              | Independent researcher, Czech Republic                                                                                                                                    |                   |               |                 |                     |               |             |                        |           |          |             |            |               |                          |                            |                                                                                                          |  |
| Keiko Ihaya                 | Kyushu University, Admission Center, Japan                                                                                                                                |                   |               |                 |                     |               |             |                        |           |          |             |            |               |                          |                            | JSPS KAKENHI Grant JP20K14222                                                                            |  |
| Gozde Ikizer                | TOBB University of Economics and Technology, Department of Psychology, Turkey                                                                                             |                   |               |                 |                     |               |             |                        |           |          |             |            |               |                          |                            |                                                                                                          |  |
| Md. Nurul Islam             | University of Chittagong, Psychology, Bangladesh                                                                                                                          |                   |               |                 |                     |               |             |                        |           |          |             |            |               |                          |                            |                                                                                                          |  |
| Alma Jeftic                 | Peace Research Institute, International Christian University, Tokyo                                                                                                       |                   |               |                 |                     |               |             |                        |           |          |             |            |               |                          |                            |                                                                                                          |  |
| Shruti Jha                  | Somerville School (Lott Carey Baptist Mission in India), Greater NOIDA, India                                                                                             |                   |               |                 |                     |               |             |                        |           |          |             |            |               |                          |                            |                                                                                                          |  |
| Fernanda Pérez-Gay Juárez   | McGill University, Canada                                                                                                                                                 |                   |               |                 |                     |               |             |                        |           |          |             |            |               |                          |                            |                                                                                                          |  |
| Pavol Kacmar                | Pavol Jozef Safarik University, Faculty of Arts, Department of Psychology, Slovakia                                                                                       |                   |               |                 |                     |               |             |                        |           |          |             |            |               |                          |                            |                                                                                                          |  |
| Kalina Kalinova             | Sofia University St. Kliment Ohridski, Bulgaria, Department of General, Experimental, Developmental, and Health Psychology                                                |                   |               |                 |                     |               |             |                        |           |          |             |            |               |                          |                            |                                                                                                          |  |
| Phillip S. Kavanagh         | Discipline of Psychology, University of Canberra                                                                                                                          |                   |               |                 |                     |               |             |                        |           |          |             |            |               |                          |                            |                                                                                                          |  |
| Mehmet Kosa                 | Tilburg University, Department of Cognitive Science and Artificial Intelligence, Netherlands                                                                              |                   |               |                 |                     |               |             |                        |           |          |             |            |               |                          |                            |                                                                                                          |  |
| Karolina Koszałkowska       | University of Lodz, Institute of Psychology, Poland                                                                                                                       |                   |               |                 |                     |               |             |                        |           |          |             |            |               |                          |                            |                                                                                                          |  |
| Raisa Kumaga                | School of Health and Social Care,University of Essex, United Kingdom                                                                                                      |                   |               |                 |                     |               |             |                        |           |          |             |            |               |                          |                            |                                                                                                          |  |
| David Lacko                 | Masaryk university, Faculty of Arts, Department of Psychology                                                                                                             |                   |               |                 |                     |               |             |                        |           |          |             |            |               |                          |                            |                                                                                                          |  |
| Yookyung Lee                | The University of Texas at Austin, Educational Psychology, USA                                                                                                            |                   |               |                 |                     |               |             |                        |           |          |             |            |               |                          |                            |                                                                                                          |  |
| Antonio G. Lentoór          | Sefako Makgatho Health Sciences University, Department of Clinical Psychology, School of Medicine                                                                         |                   |               |                 |                     |               |             |                        |           |          |             |            |               |                          |                            |                                                                                                          |  |
| Gabriel A. De Leon          | Texas A&M International University                                                                                                                                        |                   |               |                 |                     |               |             |                        |           |          |             |            |               |                          |                            |                                                                                                          |  |
| Shiang-Yi Lin               | the Education University of Hong Kong, Centre for Child and Family Sciences, Hong Kong                                                                                    |                   |               |                 |                     |               |             |                        |           |          |             |            |               |                          |                            |                                                                                                          |  |
| Samuel Lins                 | University of Porto, Faculty of Psychology and Educational Sciences, Portugal                                                                                             |                   |               |                 |                     |               |             |                        |           |          |             |            |               |                          |                            |                                                                                                          |  |
| Claudio Rafael Castro López | University of Veracruz                                                                                                                                                    |                   |               |                 |                     |               |             |                        |           |          |             |            |               |                          |                            |                                                                                                          |  |
| Agnieszka E. Lys            | University of Warsaw, Faculty of Psychology                                                                                                                               |                   |               |                 |                     |               |             |                        |           |          |             |            |               |                          |                            |                                                                                                          |  |
| Samkelisiwe Mahlunqulu      | Sefako Makgatho Health Sciences University, Department of Clinical Psychology, School of Medicine                                                                         |                   |               |                 |                     |               |             |                        |           |          |             |            |               |                          |                            |                                                                                                          |  |
| Tsvetelina Makaveeva        | Sofia University St. Kliment Ohridski, Bulgaria, Department of General, Experimental, Developmental, and Health Psychology                                                |                   |               |                 |                     |               |             |                        |           |          |             |            |               |                          |                            |                                                                                                          |  |
| Salomé Mamede               | University of Porto, Faculty of Psychology and Educational Sciences, Portugal                                                                                             |                   |               |                 |                     |               |             |                        |           |          |             |            |               |                          |                            |                                                                                                          |  |
| Silvia Mari                 | University of Milano-Bicocca                                                                                                                                              |                   |               |                 |                     |               |             |                        |           |          |             |            |               |                          |                            |                                                                                                          |  |
| Tiago A. Marot              | Pontifical Catholic University of Rio de Janeiro, Brazil                                                                                                                  |                   |               |                 |                     |               |             |                        |           |          |             |            |               |                          |                            |                                                                                                          |  |
| Liz Martinez                | University of California, Merced                                                                                                                                          |                   |               |                 |                     |               |             |                        |           |          |             |            |               |                          |                            |                                                                                                          |  |
| Dar Meshi                   | Michigan State University, Department of Advertising and Public Relations, USA                                                                                            |                   |               |                 |                     |               |             |                        |           |          |             |            |               |                          |                            |                                                                                                          |  |
| Débora Jeanette Mola        | Instituto de Investigaciones Psicológicas (IIPsi), Universidad Nacional de Córdoba (UNC), Consejo Nacional de Investigaciones Científicas y Técnicas (CONICET), Argentina |                   |               |                 |                     |               |             |                        |           |          |             |            |               |                          |                            |                                                                                                          |  |
| Sara Morales-Izquierdo      | University of Warwick, Department of Psychology                                                                                                                           |                   |               |                 |                     |               |             |                        |           |          |             |            |               |                          |                            |                                                                                                          |  |
| Arian Musliu                | Department of Psychology, Ludwig Maximilian University, Munich, Germany                                                                                                   |                   |               |                 |                     |               |             |                        |           |          |             |            |               |                          |                            |                                                                                                          |  |
| Raiisa A. Najdu             | Griffith University, School of Applied Psychology, Australia                                                                                                              |                   |               |                 |                     |               |             |                        |           |          |             |            |               |                          |                            |                                                                                                          |  |
| Arooj Najmussaqib           | Department of Professional Psychology, Bahria University Islamabad, Pakistan                                                                                              |                   |               |                 |                     |               |             |                        |           |          |             |            |               |                          |                            |                                                                                                          |  |
| Jean C. Natividade          | Pontifical Catholic University of Rio de Janeiro, Brazil                                                                                                                  |                   |               |                 |                     |               |             |                        |           |          |             |            |               |                          |                            |                                                                                                          |  |
| Steve Nebel                 | Psychology of learning with digital media, Department of Media Research, Germany                                                                                          |                   |               |                 |                     |               |             |                        |           |          |             |            |               |                          |                            |                                                                                                          |  |
| Jana Nežkusilova            | Pavol Jozef Safarik University, Slovakia                                                                                                                                  |                   |               |                 |                     |               |             |                        |           |          |             |            |               |                          |                            |                                                                                                          |  |
| Irina Nikolova              | Open University, Faculty of Management sciences                                                                                                                           |                   |               |                 |                     |               |             |                        |           |          |             |            |               |                          |                            |                                                                                                          |  |
| Manuel Ninaus               | Leibniz-Institut für Wissensmedien, Tübingen, Germany                                                                                                                     |                   |               |                 |                     |               |             |                        |           |          |             |            |               |                          |                            |                                                                                                          |  |
| Valdas Noreika              | Department of Psychology, University of Cambridge, United Kingdom                                                                                                         |                   |               |                 |                     |               |             |                        |           |          |             |            |               |                          |                            |                                                                                                          |  |
| María Victoria Ortiz        | Instituto de Investigaciones Psicológicas (IIPsi), Universidad Nacional de Córdoba (UNC), Consejo Nacional de Investigaciones Científicas y Técnicas (CONICET), Argentina |                   |               |                 |                     |               |             |                        |           |          |             |            |               |                          |                            |                                                                                                          |  |
| Daphna Hausman Ozery        | California State University, Northridge, Department of Educational Psychology & Conseling                                                                                 |                   |               |                 |                     |               |             |                        |           |          |             |            |               |                          |                            |                                                                                                          |  |
| Daniel Pankowski            | University of Economics and Human Sciences in Warsaw, Faculty of Psychology                                                                                               |                   |               |                 |                     |               |             |                        |           |          |             |            |               |                          |                            |                                                                                                          |  |
| Tiziana Pennato             | School of Compared Psychotherapy, Florence, Italy                                                                                                                         |                   |               |                 |                     |               |             |                        |           |          |             |            |               |                          |                            |                                                                                                          |  |
| Martin Pirko                | Institute of Lifelong Learning at Mendel University in Brno                                                                                                               |                   |               |                 |                     |               |             |                        |           |          |             |            |               |                          |                            |                                                                                                          |  |
| Lotte Pummerer              | Leibniz-Institut für Wissensmedien, Tübingen, Germany                                                                                                                     |                   |               |                 |                     |               |             |                        |           |          |             |            |               |                          |                            |                                                                                                          |  |
| Cecilia Reyna               | Instituto de Investigaciones Psicológicas (IIPsi), Universidad Nacional de Córdoba (UNC), Consejo Nacional de Investigaciones Científicas y Técnicas (CONICET), Argentina |                   |               |                 |                     |               |             |                        |           |          |             |            |               |                          |                            |                                                                                                          |  |
| Eugenia Romano              | King's College London, Psychological Medicine, Institute of Psychiatry, Psychology and Neurosciences                                                                      |                   |               |                 |                     |               |             |                        |           |          |             |            |               |                          |                            |                                                                                                          |  |
| Hafize Sahin                | Independent researcher, UK                                                                                                                                                |                   |               |                 |                     |               |             |                        |           |          |             |            |               |                          |                            |                                                                                                          |  |
| Aybegum Memisoglu Sanli     | Middle East Technical University, Department of Psychology                                                                                                                |                   |               |                 |                     |               |             |                        |           |          |             |            |               |                          |                            |                                                                                                          |  |
| Gülden Sayilan              | Ankara Yildirim Beyazıt University Department of Psychology, Turkey                                                                                                       |                   |               |                 |                     |               |             |                        |           |          |             |            |               |                          |                            |                                                                                                          |  |
| Alessia Scarpaci            | Independent Researcher. Psychology and Cognitive Neuroscience. Italy/United Kingdom                                                                                       |                   |               |                 |                     |               |             |                        |           |          |             |            |               |                          |                            |                                                                                                          |  |
| Cristina Sechi              | Department of Pedagogy, Psychology, Philosophy                                                                                                                            |                   |               |                 |                     |               |             |                        |           |          |             |            |               |                          |                            |                                                                                                          |  |
| Maor Shani                  | Hebrew University of Jerusalem, Israel                                                                                                                                    |                   |               |                 |                     |               |             |                        |           |          |             |            |               |                          |                            |                                                                                                          |  |
| Aya Shata                   | University of Miami, School of Communication, USA                                                                                                                         |                   |               |                 |                     |               |             |                        |           |          |             |            |               |                          |                            |                                                                                                          |  |
| Pilleriin Sikka             | University of Turku, Department of Psychology and Speech-Language Pathology, Finland; University of Skövde, Department of Cognitive Neuroscience and Philosophy, Sweden   |                   |               |                 |                     |               |             |                        |           |          |             |            |               |                          |                            |                                                                                                          |  |
| Nidhi Sinha                 | Indian Institute of Technology, Hyderabad, India                                                                                                                          |                   |               |                 |                     |               |             |                        |           |          |             |            |               |                          |                            |                                                                                                          |  |
| Sabrina Stöckli             | Department Consumer Behavior, University of Bern                                                                                                                          |                   |               |                 |                     |               |             |                        |           |          |             |            |               |                          |                            |                                                                                                          |  |
| Anna Studzinska             | University of Economics and Human Sciences in Warsaw, Faculty of Psychology                                                                                               |                   |               |                 |                     |               |             |                        |           |          |             |            |               |                          |                            |                                                                                                          |  |
| Emilija Sungailaitė         | Independent, United Kindgom                                                                                                                                               |                   |               |                 |                     |               |             |                        |           |          |             |            |               |                          |                            |                                                                                                          |  |
| Zea Szebeni                 | University of Helsinki, Swedish School of Social Sciences                                                                                                                 |                   |               |                 |                     |               |             |                        |           |          |             |            |               |                          |                            |                                                                                                          |  |
| Benjamin Tag                | University of Melbourne                                                                                                                                                   |                   |               |                 |                     |               |             |                        |           |          |             |            |               |                          |                            |                                                                                                          |  |
| Mihaela Taranu              | Aarhus University, Insitute for Culture and Society, Interacting Minds centre                                                                                             |                   |               |                 |                     |               |             |                        |           |          |             |            |               |                          |                            |                                                                                                          |  |
| Franco Tisocco              | Instituto de Investigaciones en Psicología, Facultad de Psicología, Universidad de Buenos Aires                                                                           |                   |               |                 |                     |               |             |                        |           |          |             |            |               |                          |                            |                                                                                                          |  |
| Jarno Tuominen              | University of Turku, Department of Psychology and Speech-Language Pathology, Finland                                                                                      |                   |               |                 |                     |               |             |                        |           |          |             |            |               |                          |                            |                                                                                                          |  |
| Fidan Turk                  | University of Sheffield, Department of Psychology, UK                                                                                                                     |                   |               |                 |                     |               |             |                        |           |          |             |            |               |                          |                            |                                                                                                          |  |
| Muhammad Kamal Uddin        | University of Dhaka, Department of Psychology, Bangladesh                                                                                                                 |                   |               |                 |                     |               |             |                        |           |          |             |            |               |                          |                            |                                                                                                          |  |
| Ena Uzelac                  | Faculty of Humanities and Social Sciences in Zagreb, Department of Psychology, Croatia                                                                                    |                   |               |                 |                     |               |             |                        |           |          |             |            |               |                          |                            |                                                                                                          |  |
| Sara Vestergren             | University of Salford, School of Health & Society, UK                                                                                                                     |                   |               |                 |                     |               |             |                        |           |          |             |            |               |                          |                            |                                                                                                          |  |
| Roosevelt Vilar             | Faculdades Integradas de Patos, Department of Psychology, Brazil                                                                                                          |                   |               |                 |                     |               |             |                        |           |          |             |            |               |                          |                            |                                                                                                          |  |
| Austin Hoeg-En Wang         | University of Nevada, Las Vegas                                                                                                                                           |                   |               |                 |                     |               |             |                        |           |          |             |            |               |                          |                            |                                                                                                          |  |
| J. Noël West                | University of Sheffield, Department of Philosophy                                                                                                                         |                   |               |                 |                     |               |             |                        |           |          |             |            |               |                          |                            |                                                                                                          |  |
| Charles K.S. Wu             | Department of Political Science, Purdue University                                                                                                                        |                   |               |                 |                     |               |             |                        |           |          |             |            |               |                          |                            |                                                                                                          |  |
| Teodora Yaneva              | Sofia University St. Kliment Ohridski, Bulgaria, Department of General, Experimental, Developmental, and Health Psychology                                                |                   |               |                 |                     |               |             |                        |           |          |             |            |               |                          |                            |                                                                                                          |  |
| Yao-Yuan Yeh                | University of St. Thomas, Houston, Center for International Studies, USA                                                                                                  |                   |               |                 |                     |               |             |                        |           |          |             |            |               |                          |                            |                                                                                                          |  |
